# Supplementary material for: The Link between Morphotype Transition and Virulence in Cryptococcus neoformans
Source: PLoS Pathog. 2012 Jun 21;8(6):e1002765. doi: 10.1371/journal.ppat.1002765 (PMC3380952; doi:10.1371/journal.ppat.1002765)
Supplement: Table S3 — Primers used in this study. (DOC) [file ppat.1002765.s016.doc]

Table S3. Primers used in this study.

| **Comments** | **Primer name** | **Sequence** |
| --- | --- | --- |
| *ZNF2* (H99)overexpression | Linlab 599 | GTTTAATTAACCAGTCGATAACTCGATTTAG |
| Linlab 600 | TGATCTGGCCGGCCCGGCCTGATATGCTGGAG |
| *ZNF2* (JEC21)overexpression | Linlab 602 | GTTTAATTAAAGGACCAGTCAATACTTTGGA |
| Linlab 603 | TGATCTGGCCGGCCAATCAAAATGGACGTTCTTGA |
| P*CTR4-2* | Linlab677 | AAGGAAAAAAGCGGCCGCGCCAAATCAAGCTTATCGATG |
| Linlab678 | TGATCTGGCCGGCCGATTGGTGAAGTCGTTGTCGTA |
| P*GAL10* | Linlab646 | AAGGAAAAAAGCGGCCGCGCGGGGAGTACAGGCTAAGCGT |
| Linlab647 | TGATCTGGCCGGCCGGTAACTCGAGTCTGTTCAAAAACCA |
| *MAT2*  overexpression | Linlab767 | TGATCTGGCCGGCCTCACATCATGGCGGCCAATCA |
| Linlab768 | GTTTAATTAAACTAGGGTATACCACTCAGGCGTCT |
| *CFL1* (H99)  overexpression | Linlab827 | TGATCTGGCCGGCCAGACATCATGCTCGTTAGCAACATC |
| Linlab828 | GTTTAATTAAGAACGCTCAAGAGGAATATTCAGAC |
| CNAG_05729  overexpression | LinLab759 | TGATCTGGCCGGCCCATCAAGATGCGATTCACCTCCAT |
| LinLab760 | GTTTAATTAATGATAACGGGGCTTAAAGAATAGA |
| CNAG_06411  overexpression | LinLab755 | TGATCTGGCCGGCCTAAAATAATGTTCCCTTTCAACTCT |
| LinLab756 | GTTTAATTAAGTGATTCCTTTAGCAAGTAATAGAA |
| CNAG_06239  Overexpression | LinLab825 | TGATCTGGCCGGCCTCCCATCATGTCTGCGTCAATT |
| LinLab826 | GTTTAATTAAATGTATCATTATCCATCTATGGCAA |
| CNAG_07422 overexpression | Linlab761 | TGATCTGGCCGGCCACCCGCCATGTTCTCGTCCACTA |
| Linlab762 | GTTTAATTAACGTCGATATACATCTTACAGCTGGA |
| CNAG_05778  overexpression | Linlab831 | TGATCTGGCCGGCCGCCCACTATGCCCGCTAACTTTA |
| Linlab832 | GTTTAATTAATTGGTTAAAATGATACCTAAAATTGTC |
| CNAG_00596  overexpression | Linlab765 | TGATCTGGCCGGCCCAACACGATGATACGCCTCAACATC |
| Linlab766 | GTTTAATTAACCATCGGACATAGAAGATTAGATGA |
| CNAG_00925  overexpression | Linlab763 | TGATCTGGCCGGCCTGTCAGGATGCGTTTTACTTCTATC |
| Linlab764 | GTTTAATTAATTGCTGGTTCCAGTACTTAAAGGAT |
| CNAG_01121  overexpression | Linlab833 | TGATCTGGCCGGCCCAGCAACATGTTCTTCACATATCTC |
| Linlab834 | GTTTAATTAACAAAAAGAGAAGAATTATCTGCTGC |
| *MAT2* (JEC21)  overexpression | Linlab767 | TGATCTGGCCGGCCTCACATCATGGCGGCCAATCA |
| Linlab768 | GTTTAATTAAACTAGGGTATACCACTCAGGCGTCT |
| *cfl1* deletion (JEC21/20 and XL280) | 16025 | CCGGCCGAACATCTACG |
| 16026 | CTGGCCGTCGTTTTACCGAGCATGCCGTCCACAG |
| 16027 | GTCATAGCTGTTTCCTGGGCACCCAGTGTATCGCTG |
| 16028 | GGTGCGTGCCAAAGGAC |
| 16029 | CGATCGAGGGCAGGGAAG |
| Linlab866 | GCCCTTGCTCACCATAACAGCGATACACTGGGTGCCAT |
| Linlab867 | ATGGCACCCAGTGTATCGCTGTTATGGTGAGCAAGGGC |
| Linlab864 | GTTTAATTAATTACTTGTACAGCTCGTCCA |
| P*CFL1-CFL1-mCherry* (H99) | Linlab861 | TCAGCGGCCGCATAGAAATGCCCGTTGGCATT |
| Linlab862 | GCCCTTGCTCACCATGACAGCGATACATTCGGTGCCA |
| Linlab863 | TGGCACCGAATGTATCGCTGTCATGGTGAGCAAGGGC |
| Linlab864 | GTTTAATTAATTACTTGTACAGCTCGTCCA |
| P*CFL1-CFL1(sigP*Δ*)-mCherry* (H99) | Linlab948 | TGATCTGGCCGGCCAGACATCATGAACGGAATCTCCTTG  GCGATG |
| Linlab862 | GCCCTTGCTCACCATGACAGCGATACATTCGGTGCCA |
| Linlab863 | TGGCACCGAATGTATCGCTGTCATGGTGAGCAAGGGC |
| Linlab864 | GTTTAATTAATTACTTGTACAGCTCGTCCA |
| P*CFL1-CFL1-mCherry* (JEC21/20) | Linlab865 | TCAGCGGCCGCCGAACATCTACGAGAGCCATCA |
| Linlab866 | GCCCTTGCTCACCATAACAGCGATACACTGGGTGCCAT |
| Linlab867 | ATGGCACCCAGTGTATCGCTGTTATGGTGAGCAAGGGC |
| Linlab864 | GTTTAATTAATTACTTGTACAGCTCGTCCA |
| *TEF1* QPCR | Linlab 329 | CGTCACCACTGAAGTCAAGT |
| Linlab 330 | AGAAGCAGCCTCCATAGG |
| *MAT2* (CNAG_06203) QPCR | Linlab 975 | GCTCCTCGCTACATCTCCTCA |
| Linlab 976 | TGTTTCGGTCTACGATACCAGTT |
| *STE3* (CNAG_06808) QPCR | Linlab 977 | CCCTGCATCATCCATCCTTT |
| Linlab 978 | GTATTCCCCCATCGCATCAA |
| *STE6* (CNAG_03600) QPCR | Linlab 973 | TAGTTTGAGGGAAGCGGATGT |
| Linlab 974 | GACCCGTAGGCGATGTTTTC |
| Linlab 732 | TCATCTCGGACCTCTTCTG |
| *MF1* (CNAG_07406)QPCR | Linlab 577 | GCCTTCACTGCCATCTTC |
| Linlab 578 | TTAGGCGATGACGCATAG |
| *ZNF2* (CNAG_03366) QPCR | Linlab 333 | GCTCAACGTCACATCAAGC |
| Linlab 334 | CTTGTGGCTCGTCAAAATG |
| LinLab330 | AGAAGCAGCCTCCATAGG |
| *ACT1* QPCR | LinLab323 | GCCCTTGCTCCTTCTTCTAT |
| LinLab324 | GACGATTGAGGGACCAGACT |
| Linlab820 | GCAACCACCACAAGAGTTC |
| CNAG_04944 | Linlab803 | GGTGAAGAATCTCCTGAAGG |
| Linlab804 | CATAGCAAGCAACCCAGTC |
| CNAG_05729 QPCR | LinLab347 | CTGTCCAACGTTATCCAGAC |
| LinLab348 | CCACCAAGGAGTGACTTTAG |
| CNAG_06411  QPCR | LinLab345 | CAGATGATTGAAGTGCCTATG |
| LinLab346 | CCAGAGTGGTAGTTGAAGTTG |
| CNAG_06239 QPCR | LinLab343 | CACTCACTCGACGATCCTG |
| LinLab344 | CAAGGACCCTTGACAGGAC |
| CNAG_07422 QPCR | Linlab731 | TCTTGTGGTGACGAAACTGT |
| Linlab732 | TCATCTCGGACCTCTTCTG |
| CNAG_05778 QPCR | Linlab799 | CTTCAGTGCTGCTGTGAGTG |
| Linlab800 | AGTGACGCTTGAAGCAGTAG |
| CNAG_00596 QPCR | Linlab718 | GTGGCTACATCGATTGGAC |
| Linlab719 | AGAGTTGACGCATTGGTAGT |
| CNAG_00925 QPCR | Linlab733 | CAGGCAATTCATCAACATTC |
| Linlab734 | CACCAACATCAATGAGAAGG |
| *CFL1* QPCR | Linlab795 | GGTCTCTCCATGCTTGTACC |
| Linlab796 | CCAGATTTGCAGCTGTAGAC |
| CNAG_01121  QPCR | Linlab801 | GGTCTACTACATCCCACAATG |
| Linlab802 | CCTGTGAGGTCGTACCAGT |
